# Supplementary material
Source: PubMed Central journal article supplement (PMC3217172)
Supplement: NIHMS331279-supplement-Supp_Table_S1.pdf [file NIHMS331279-supplement-Supp_Table_S1.pdf]

**Supplemental Table S1.** Other peptides identified from wild type mice spinal cord by MS/MS

| Precursor                                                                      | Peptide name     | Peptide sequence                  | Obs. Mass | Theor. Mass | Error (ppm) | PEAKS Score | LC-ESI-IT | LC-ESI-Q-TOF |
|--------------------------------------------------------------------------------|------------------|-----------------------------------|-----------|-------------|-------------|-------------|-----------|--------------|
| ATP synthase, H <sup>+</sup> transporting, mitochondrial F0 complex, subunit F | C-terminus       | D.PKFEVIDKPKS.#                   | 1286.97   | 1286.69     | 218         | 89          | X         |              |
| Complexin                                                                      | C-terminus       | D.TVIKYLPGPLQDMFKK.#              | 1877.04   | 1877.05     | 5           | 98          |           | X            |
| Cytochrome c oxidase subunit 5a                                                | C-terminus       | L.RPTLNELGISTPEELGLDKV.#          | 2180.96   | 2180.17     | 362         | 99          | X         | X            |
| Cytochrome c oxidase subunit 5a                                                | C-terminus       | L.GISTPEELGLDKV.#                 | 1357.11   | 1356.71     | 295         | 99          | X         |              |
| Hemoglobin alpha                                                               | C-terminus       | H.ASLDKFLASVSTVLTISKYR.#          | 2085.77   | 2085.15     | 297         | 92          | X         |              |
| Myelin basic protein isoform 4                                                 | 11-17            | R.SKYLATA.S                       | 752.35    | 752.41      | 80          | 91          |           | X            |
| Myelin basic protein isoform 4                                                 | 26-33            | H.GFLPRHRD.T                      | 996.39    | 996.53      | 141         | 52          |           | X            |
| Myelin basic protein isoform 4                                                 | 34-44            | D.TGILDSIGRFF.S                   | 1224.65   | 1224.65     | 0           | 99          |           | X            |
| Myelin basic protein isoform 4                                                 | 36-44            | G.ILDSIGRFF.S                     | 1066.55   | 1066.58     | 28          | 99          | X         |              |
| Myelin basic protein isoform 4                                                 | 42-48            | G.RFFSGDR.G                       | 883.28    | 883.43      | 170         | 99          |           | X            |
| Myelin basic protein isoform 4                                                 | 42-49            | G.RFFSGDRG.A                      | 940.49    | 940.45      | 43          | 96          |           | X            |
| Myelin basic protein isoform 4                                                 | 89-98            | R.TTHYGSLPQK.S                    | 1130.6    | 1130.57     | 27          | 99          |           | X            |
| Myelin basic protein isoform 4                                                 | 104-112          | R.TQDENPVVH.F                     | 1037.55   | 1037.48     | 67          | 99          |           | X            |
| Myelin basic protein isoform 4                                                 | 104-121          | R.TQDENPVVHFFKNIVTPR.T            | 2140.43   | 2140.11     | 150         | 94          | X         | X            |
| Myelin basic protein isoform 4                                                 | 109-121          | N.PVVHFFKNIVTPR.T                 | 1553.04   | 1552.89     | 97          | 99          | X         | X            |
| Myelin basic protein isoform 4                                                 | 128-135          | Q.GKGRGLSL.S                      | 786.53    | 786.47      | 76          | 86          |           | X            |
| Myelin basic protein isoform 4                                                 | C-terminus       | F.SWGGDRSRSGSPMARR.#              | 1761.99   | 1761.84     | 85          | 85          |           | X            |
| Myelin basic protein isoform 5                                                 | 137-146          | G.TLSKIFKLG.R                     | 1062.65   | 1062.64     | 9           | 99          |           | X            |
| Orphan G protein-coupled Receptor                                              | 271-282          | A.ILLGVTSLFALL.W                  | 1259.17   | 1258.79     | 302         | 90          |           | X            |
| Peptidylprolyl isomerase A                                                     | 2-22             | M.(AcetylV)NPTVFFDITADDEPLGRVSF.E | 2380.49   | 2380.16     | 139         | 99          | X         |              |
| Ubiquitin                                                                      | 57-76 (multiple) | L.SDYNIQKESTLHLVLRRLRGG.(I/M)     | 2297.75   | 2298.25     | 218         | 97          |           | X            |
| Thymosin beta-4                                                                | 8-21             | M.SD(AcetylK)PDMAEIEKFDK.S        | 1693.99   | 1693.79     | 118         | 53          | X         |              |

(.) indicates a cleavage site; Pound (#) indicates the end of a precursor sequence; "X" indicates the MS/MS platforms used to identify the peptide; Obs. mass, observed monoisotopic mass; Theor. mass, theoretical monoisotopic mass; Putative PTM includes acetylation ("Acetyl")
